# Supplementary material
Source: Research Square preprint supplement (doi:10.21203/rs.3.rs-9581546/v1)
Supplement: Supplementary file 1 [file a5ac77688608da44d02a4de2.docx]

**Table I. ASUWOG FA scoring system.**


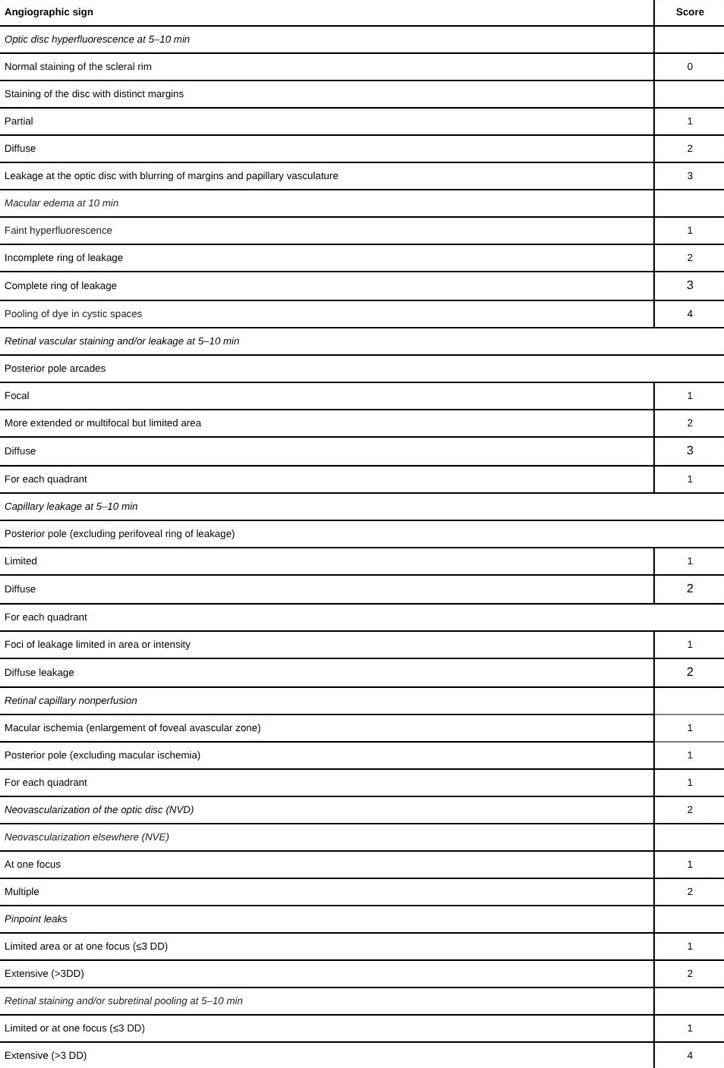


**Table II. Demographic and clinical characteristics of the participants**

|  | **Group 1 Patients**  **(n=37 eyes)** | **Group 2 Patients**  **(n=42)** | **Controls**  **(n=40)** | **p** |
| --- | --- | --- | --- | --- |
| **Gender, n (%)**  Female  Male | 18 (48.60)  19 (51.40) | 15 (35.70)  27 (64.30) | 21 (52.50)  19 (47.50) | 0.278* |
| **Mean age (years) ± SD (range)** | 37.35±10.62  35.00 (21.00-63.00) | 36.21±7.08  36.00 (24.00-56.00) | 33.50±9.84  31.00 (18.00-60.00) | 0.129** |
| **Duration of BD (years)** | 6.49±3.76  5.00 (1.00-17.00) | 6.71±4.55  5.50 (1.00-20.00) | - | 0.929*** |
| **Number of uveitis relapses** | 2.59±1.18  3.00 (1.00-6.00) |  |  |  |
| **Time interval between remission and activation**  **(months)** | 14.2 ± 8.6  12.0 (8–18) |  |  |  |
| **Treatment n (%)**  Azathioprine  Colchicine  Azathioprine+Colchicine  Adalimumab  Infliximab  Interferon | 5 (13.5)  9 (24.30)  6 (16.20)  12 (32.4)  3 (8.1)  2 (5.40) | 17 (40.50)  25 (59.50)  5 (11.90)  -  -  2 (4.80) | - | - |
| **Mean BCVA (LogMar)± SD (range)** | 0.31±0.26  0.20 (0.00-1.00) | 0.02±0.05  0.00 (0.00-0.20) | 0.00±0.00  0.00 (0.00-0.00) | **<0.001**** |

**BD:** Behcet’s disease**, BCVA:** Best corrected visual acuity**, SD:** Standard deviation

*: Pearson Chi**−**Square test

**: Kruskal**−**Wallis test

***: Mann **−**Whitney U test

**Table III. Parameters from the OCT, OCT-A, and EDI-OCT images of all the participants**

|  | **Group 1**  **(n=37) a** | **Group 2**  **(n=42) b** | **Controls**  **(n=40) c** | **p*** | **Post hoc**** |
| --- | --- | --- | --- | --- | --- |
| **Mean CMT (μm)** | 262.62±30.53  270.00 (200.00-335.00) | 275.57±22.97  275.00 (233.00-347.00) | 275.47±20.30  276.50 (236.00-314.00) | 0.025 |  |
| **Central RNFL Thickness (μm)** | 101.21±14.15  100.00 (67.00-131.00) | 101.47±9.65  100.50 (88.00-128.00) | 103.35±7.84  103.50 (89.00-126.00) | 0.262 |  |
| **FAZ (µm2)** | 290.21 ±60.01  310.12 (150.02-390.0) | 250.02±40.02  260.3 (170.04-400.11) | 230.02±50.07  240.02 (100.05-320.02) | **0.001** | **a-b:0.030**  **a-c: 0.003** |
| **CVD- superficial (%)** | 47.69±2.96  47.80 (40.30-51.60) | 50.49±3.32  50.40 (43.80-60.40) | 52.21±1.39  52.00 (50.00-55.50) | **<0.001** | **a-b:0.003**  **a-c<0.001**  **b-c:0.024** |
| **CVD (parafoveal)**  **superficial (%)** | 48.76±4.41  49.40 (36.30-55.70) | 51.36±2.92  52.00 (45.90-60.10) | 52.86±1.34  52.90 (50.50-55.90) | **<0.001** | **a-b:0.021**  **a-c<0.001**  **b-c: 0.042** |
| **CVD-deep**  **(%)** | 47.81±4.41  48.40 (36.30-55.70) | 51.88±3.94  52.10 (40.80-60.10) | 53.53±2.37  53.05 (49.80-58.70) | **<0.001** | **a-b<0.001**  **a-c<0.001** |
| **CVD (parafoveal)**  **deep (%)** | 49.54±5.05  49.90 (38.60-58.40) | 53.33±4.22  53.95 (42.70-61.20) | 54.41±2.73  54.00 (50.00-60.60) | **<0.001** | **a-b:0.003**  **a-c<0.001** |
| **CVD**  **(radial peripapillary) (%)** | 48.28±2.86  48.90 (40.00-53.90) | 49.03±2.69  48.95 (41.70-53.10) | 57.82±2.77  58.30 (50.80-62.50) | **<0.001** | **a-b<0.001**  **b-c<0.001** |
| **Sub foveal**  **ChT (μm)** | 266.27±28.64  270.00 (190.00-315.00) | 219.28±20.25  220.00 (182.00-277.00) | 219.65±15.51  217.00 (185.00-258.00) | **<0.001** | **a-b<0.001**  **a-c<0.001** |

**BD:** Behcet’s disease**, BCVA:** Best corrected visual acuity**, SD:** Standard deviation

**CMT:** Central macular thickness, **RNFL:** Retina nerve fiber layer **FAZ:** Foveal avascular zone, **CVD:** Capillary vessel density **ChT:** Choroidal thickness

*: Kruskal‒Wallis test

**: Mann‒Whitney U test

**Table IV:** Relationships between OCT, EDI-OCT, and OCTA parameters and FA scores across with treatment groups

|  | **Anti-TNF** | **Azathioprine** | **Colchicine** | **Colchicine+**  **Azathioprine** | **Interferon** | **p** |
| --- | --- | --- | --- | --- | --- | --- |
| **Mean CMT (μm)** | 253.0 ± 31.1 | 271.0 ± 22.1 | 270.3±18.9 | 278.8 ± 42.5 | 231.5±26.2 | 0.186 |
| **Central RNFL Thickness (μm)** | 101.2 ± 9.8 | 104.5 ± 8.2 | 106.1 ± 7.4 | 103.3 ± 9.1 | 98.6 ± 10.5 | 0.278 |
| **FAZ (µm2)** | 0.307±0.065 | 0.344±0.037 | 0.252±0.052 | 0.252. ± 0052 | 0.312±0.035 | 0.105 |
| **CVD- superficial (%)** | 46.43±3.32 | 48.58 ± 1.84 | 50.01 ± 1.37 | 47.22 ± 2.90 | 45.95 ± 2.62 | 0.051 |
| **CVD (parafoveal)**  **superficial (%)** | 49.43±4.72 | 50.58 ± 1.14 | 52.01 ±2.47 | 49.22 ± 2.90 | 47.65 ± 1.52 | 0.121 |
| **CVD-deep**  **(%)** | 46.85±4.11 | 49.22 ± 3.20 | 50.62 ± 2.94 | 44.75 ± 5.36 | 48.15 ± 7.71 | 0.134 |
| **CVD (parafoveal)**  **deep (%)** | 47.65±5.21 | 50.42 ± 2.25 | 52.31 ± 2.14 | 45.75 ± 4.12 | 49.27 ± 3.11 | 0.15 |
| **CVD**  **(radial peripapillary) (%)** | 47.57 ± 2.75 | 49.44 ± 2.56 | 49.12 ± 2.02 | 49.53 ± 2.33 | 43.20 ± 4.53 | 0.113 |
| **Sub foveal**  **ChT (μm)** | 259.7 ± 32.9 | 268.2 ± 8.44 | 278.0 ± 25.0 | 255.0 ± 29.5 | 292.0 ± 26.9 | 0.363 |
| **FA score** | 16.27±4.22 | 8.20±2.28 | 11.56±3.54 | 10.83±2.86 | 17.0±15.56 | **0.007** |

**CMT:** Central macular thickness, **RNFL:** Retinal nerve fiber layer **FAZ:** Foveal avascular zone,

**CVD:** Capillary vessel density **ChT:** Choroidal thickness, **Anti TNF**: Antitumor necrosis factor (Adalimumab, Infliksimab)

**Table V:** Comparison of OCT, OCT-A, and EDI-OCT parameters between the BD without uveitis group and the control group.

|  | **Group 2**  **(n=42) b** | **Controls**  **(n=40) c** | **p*** |
| --- | --- | --- | --- |
| **Mean CMT (μm)** | 275.57±22.97  275.00 (233.00-347.00) | 265.47±20.30  266.50 (203.00-314.00) | 0.099 |
| **Central RNFL Thickness (μm)** | 101.47±9.65  100.50 (88.00-128.00) | 103.35±7.84  103.50 (89.00-126.00) | 0.213 |
| **FAZ (µm2)** | 250.02±40.02  260.3 (170.04-400.11) | 230.02±50.07  240.02 (100.05-320.02) | 0.079 |
| **CVD- superficial (%)** | 50.49±3.32  50.40 (43.80-60.40) | 52.21±1.39  52.00 (50.00-55.50) | **0.008** |
| **CVD (parafoveal)**  **superficial (%)** | 51.36±2.92  52.00 (45.90-60.10) | 52.86±1.34  52.90 (50.50-55.90) | 0.014 |
| **CVD-deep**  **(%)** | 51.88±3.94  52.10 (40.80-60.10) | 53.53±2.37  53.05 (49.80-58.70) | 0.055 |
| **CVD (parafoveal)**  **deep (%)** | 53.33±4.22  53.95 (42.70-61.20) | 54.41±2.73  54.00 (50.00-60.60) | 0.346 |
| **CVD**  **(radial peripapillary) (%)** | 49.03±2.69  48.95 (41.70-53.10) | 57.82±2.77  58.30 (50.80-62.50) | **<0.001** |

| **Sub foveal**  **ChT (μm)** | 219.28±20.25  220.00 (182.00-277.00) | 219.65±15.51  217.00 (185.00-258.00) | 0.831 |
| --- | --- | --- | --- |

**CMT:** Central macular thickness, **RNFL:** Retinal nerve fiber layer **FAZ:** Foveal avascular zone,

**CVD:** Capillary vessel density **ChT:** Choroidal thickness

*: Mann‒Whitney U Test

**Table VI:** Relationships between OCT, EDI-OCT, and OCTA parameters and disease duration, number of relapses, and visual acuity in BU patients

|  | **Duration of Disease** | | **Number of relaps** | | **VA (logMAR)** | | **Time interval between remission and activation** | |
| --- | --- | --- | --- | --- | --- | --- | --- | --- |
|  | **r** | **p*** | **r** | **p*** | **r** | **p*** | **r** | **p*** |
| **Mean CMT (μm)** | -0.144 | 0.394 | -0.263 | 0.116 | -0.061 | 0.719 | -0.14 | 0.173 |
| **Central RNFL Thickness (μm)** | -0.150 | 0.375 | 0.057 | 0.735 | -0.406 | **0.013** | -0.23 | 0.302 |
| **FAZ (µm2)** | 0.087 | 0.609 | -0.189 | 0.262 | -0.325 | 0.050 | 0.041 | 0.224 |
| **CVD- superficial (%)** | -0.169 | 0.319 | 0.018 | 0.914 | -0.164 | 0.332 | -0.17 | 0.29 |
| **CVD (parafoveal)**  **superficial (%)** | -0.132 | 0.436 | -0.015 | 0.931 | 0.041 | 0.808 | 0.14 | 0.345 |
| **CVD-deep**  **(%)** | -0.174 | 0.302 | -0.068 | 0.690 | -0.109 | 0.522 | -0.11 | 0.451 |
| **CVD (parafoveal)**  **deep (%)** | -0.195 | 0.248 | -0.071 | 0.675 | -0.143 | 0.399 | -0.18 | 0.415 |
| **CVD**  **(radial peripapillary) (%)** | -0.026 | 0.880 | -0.239 | 0.154 | -0.538 | **0.001** | -0.16 | 0.312 |
| **Sub foveal**  **ChT (μm)** | 0.189 | 0.262 | -0.023 | 0.893 | -0.079 | 0.642 | 0.171 | -0.32 |

**VA:** Vision Acuity **CMT:** Central macular thickness, **RNFL:** Retinal nerve fiber layer **FAZ:** Foveal avascular zone,

**CVD:** Capillary vessel density **ChT:** Choroidal thickness

*: Spearman correlation test

**Table VII.** Relationships between FA score, CMT (μm), FAZ (µm 2) and OCTA imaging outcomes in BU patients

|  | **FA score** | | **CMT (μm)** | | **FAZ (µm2)** | |
| --- | --- | --- | --- | --- | --- | --- |
|  | **r** | **p*** | **r** | **p*** | **r** | **p*** |
| **Mean CMT (μm)** | -0.211 | 0.210 | - | **-** | -0.347 | **0.035** |
| **Central RNFL Thickness (μm)** | -0.027 | 0.874 | 0.085 | 0.619 | 0.208 | 0.218 |
| **FAZ (µm2)** | 0.449 | **<0.001** | -0.347 | **0.035** | - | - |
| **CVD- superficial (%)** | -0.696 | **<0.001** | 0.337 | **0.042** | -0.356 | **0.030** |
| **CVD (parafoveal)**  **superficial (%)** | -0.573 | **<0.001** | 0.288 | 0.083 | -0.272 | 0.104 |
| **CVD-deep**  **(%)** | -0.593 | **<0.001** | 0.078 | 0.647 | -0.346 | **0.036** |
| **CVD (parafoveal)**  **deep (%)** | -0.546 | **<0.001** | -0.052 | 0.759 | -0.151 | 0.371 |
| **CVD**  **(radial**  **peripapillary) (%)** | -0.330 | **0.046** | 0.204 | 0.225 | 0.105 | 0.537 |
| **Sub foveal**  **ChT (μm)** | -0.021 | 0.901 | -0.128 | 0.451 | 0.210 | 0.213 |

**FA:** Flourescein angiography **CMT:** Central macular thickness **OCTA:** Optic coherence tomography angiography, **RNFL:** Retinal nerve fiber layer **FAZ:** Foveal avascular zone

**CVD:** Capillary vessel density **ChT:** Choroidal thickness

*: Spearman correlation test

**Table VIII:** ROC Analysis Table of OCT-A Parameters in Patients with BU

|  | **FAZ** | **Sub foveal**  **ChT (μm)** | **CVD- superficial (%)** | **CVD-parafoveal**  **superficial (%)** | **CVD-deep**  **(%)** | **CVD- parafoveal**  **deep (%)** | **CVD-radial peripapillary**  **(%)** |
| --- | --- | --- | --- | --- | --- | --- | --- |
| **Cutoff value** | ≥0.270 | ≥238.000 | ≤49.000 | ≤50.000 | ≤50.650 | ≤52.550 | ≤53.450 |
| **AUC (95% CI)** | 0.669 (0.539-0.799) | 0.895 (0.817-0.972 | 0.722 (0.611-0.833) | 0.676 (0.559-0.794) | 0.767 (0.664-0.871) | 0.725 (0.612-0.837) | 0.992 (0.980-0.999) |
| **Sensitivity (95% CI)** | 64.86 (47.46-79.79) | 86.49 (71.23-95.46) | 62.16 (46.94-77.88) | 56.76 (39.49-72.90) | 67.57 (50.21-81.99) | 67.57 (50.21-81.99) | 97.30 (85.84-99.93) |
| **Specificity (95% CI)** | 61.90 (45.64-76.43) | 88.10 (74.37-96.02) | 63.41 (46.94-77.88) | 64.29 (48.03-78.45) | 66.67 (50.45-80.43) | 64.29 (48.03-78.45) | 95.24 (83.84-99.42) |
| **PPV (95% CI)** | 60.00 (48.82-70.23) | 86.49 (73.57-93.64) | 60.53 (48.81-71.14) | 58.33 (46.08-69.64) | 64.10 (52.43-74.31) | 62.50 (51.19-72.59) | 94.74 (82.30-98.59) |
| **NPV (95% CI)** | 66.67 (54.86-76.69) | 88.10 (76.47-94.40) | 65.00 (53.62-74.89) | 62.79 (52.27-72.23) | 70.00 (58.31-79.56) | 69.23 (57.30-79.05) | 97.56 (85.25-99.64) |
| **Accuracy (95% CI)** | 63.29 (51.69-73.86) | 87.34 (77.95-93.76) | 62.82 (51.13-73.50) | 60.76 (49.13-71.56) | 67.09 (55.60-77.25) | 65.82 (54.29-76.13) | 96.20 (89.30-99.21) |

**FAZ:** Foveal avascular zone, **CVD:** Capillary vessel density, **ChT:** Choroidal thickness, **CI:** Confidence interval, **AUC:** Area under the curve, **PPV:** Positive predictive value, **NPV:** Negative predictive value
